1 Diabetes-related Distress and the Association to Hypertension and  
2 Cardiovascular Disease Among Individuals Living with Type 2  
3 Diabetes in Rural areas in Vietnam

4  
5 Amalie Sahl, Diep Khong Thi, Nguen Duc Thanh, Huyen Dieu, Jens Søndergaard, Janni Nielsen, Ib Christian Bygbjerg,  
6 Tine Gammeltoft, Dan W. Meyrowitsch  
7  
8  
9

---

---

10 **ABSTRACT**

11 **Objective**

12 The prevalence of diabetes has been rising in rural areas of Vietnam over the last years to the  
13 extend where it has become a public health burden. Individuals with diabetes-related distress  
14 (DRD) is in greater risk of adverse health outcomes e.g. lower blood sugar control and  
15 polypharmacy. The objective of this study is to assess the association between hypertension and  
16 cardiovascular disease (CVD) and the occurrence of DRD among individuals with type 2 diabetes  
17 (T2D) in rural areas of Vietnam.

18 **Method**

19 This is a cross-sectional study of 806 individuals who had been receiving treatment for T2D at a  
20 district hospital in the northern Vietnamese province Thai Binh. Based on self-reported data DRD  
21 was assessed through Problem Areas in Diabetes scale 5 (PAID5) and defined as a score of 8 or  
22 above. The occurrence of the comorbid conditions hypertension and CVD were self-reported.

23 **Results**

24 Among 806 individuals with T2D 37.7% of the men and 62.3% of the women presented with DRD.  
25 Out of the total group 35.6% reported hypertension, 7.3% reported CVD and 21.2% reported a  
26 combination of hypertension and CVD. The results of the multivariate analyses showed that the  
27 odds ratio of DRD was significantly higher (OR=1.67, CI95: 1.11-2.52) in the group who reported a  
28 combination of hypertension and CVD.

29 **Conclusion**

30 Among individuals with T2D in rural areas of Vietnam there is an increased risk of DRD if a  
31 combination of hypertension and cardiovascular disease is also present. Hence, considering

NOTE: This preprint reports new research that has not been certified by peer review and should not be used to guide clinical practice.

32 diabetes-related comorbidities can be useful in order to successfully identify individuals in risk of  
33 DRD.

---

34

35

## 36 **BACKGROUND**

37 Over the last decades the occurrence of type 2 diabetes (T2D) has increased rapidly throughout Asia  
38 with three-fold to five-fold increase in several countries suggesting that by 2025 as many as 333  
39 million people will live with T2D[1]. In 2012, the prevalence of diabetes in Vietnam was 5.4% with a  
40 lower prevalence of diabetes in the rural communities as compared to urban communities but is  
41 now on the rise and the increasing number of individuals living with T2D is becoming a financial and  
42 public health burden[2, 3].

43

44 Diabetes-related distress (DRD) is defined as the emotional distress and the behavioural changes  
45 associated with diabetes[4, 5]. This includes feeling overwhelmed, scared and angry when thinking  
46 about diabetes, as well as not feeling motivated to maintain diabetes self-management[6].

47 DRD is common among individuals with T2D. A systematic review, including 55 studies from  
48 different countries, showed that approximately 36% of individuals with T2D were suffering from  
49 DRD[7]. In a previous study on DRD, with data from the same population as used in the present  
50 study, 50% of the individuals reported symptoms of DRD[8]. In addition, a smaller study from a  
51 medical centre in Vietnam showed that approximately 12% of the individuals diagnosed with T2D  
52 presented with DRD[9].

53 Besides the psychological impact of DRD, studies from high-income countries report that DRD  
54 influences glycaemic control and self-care: people with DRD had higher blood levels of triglycerides  
55 and higher BMI[5, 10].

56 Additionally, two more recent studies based on analyses of data from the same population in  
57 Vietnam as used in the present study, DRD was associated with the occurrence of polypharmacy  
58 and unmet needs for social support[8, 11].

59

60 Given the adverse health outcomes associated with DRD, it is important to consider and address the  
61 risks of developing DRD in the planning and implementing of new interventions directed towards  
62 the treatment of T2D. This will increase both the quality of care and the relevance of this care for  
63 individuals living with T2D[5].

64

65 Comorbidities are common in individuals living with diabetes. Individuals with diabetes have an  
66 increased risk of cardiovascular disease (CVD) and this risk increases further if hypertension is also  
67 present[12]. A systematic review showed that CVD globally affects 32.2% of individuals living with  
68 T2D[13], and in the US occurrence of ischaemic heart disease is higher among individuals with T2D  
69 who showed symptoms of DRD [14, 15].

70

71 An improved understanding of risk factors for DRD, and in turn the possibility of identifying  
72 individuals at risk of DRD, and therefore those who may have a higher risk of diabetes-related  
73 complications can potentially inform the development of effective and cost-effective treatment.  
74 This is specifically aimed at individuals diagnosed with T2D who are living in resource-constrained  
75 communities where treatment is challenging.

76 Therefore, a cross-sectional study was conducted to assess the association between hypertension  
77 and/or CVD and DRD among individuals living with T2D in Thai Binh Province, Vietnam.

78

79 **METHODS**

80 **Study Design, Setting, Recruitment and Sample**

81 A cross sectional survey was carried out in Thai Binh Province Vietnam from December 2018 to  
82 February 2019. Thai Binh Province is a coastal province located in the northern part of Vietnam.  
83 The province is divided into 7 districts and one city and covers an area of 1542 km<sup>2</sup> and consisted  
84 of a population of approximately 1.8 million individuals in 2019. Self-reported data were collected  
85 as part of the research project “Living Together with Chronic Disease: Informal Support for  
86 Diabetes Management in Vietnam (VALID)”.

87

88 The sample included individuals who had been diagnosed with T2D after the age of 40. The age of  
89 diagnose criteria was set in order to exclude individuals who could possibly have type 1 diabetes.

90

91 Based on district hospital records, two districts in Thai Binh Province were randomly selected for  
92 the study. The two districts were Quynh Phu District and Vu Thu District in the northern part and  
93 the southern part of the province, respectively. Quynh Phu District and Vu Thu District include two  
94 district hospitals and one district hospital. In each district the researchers selected the two  
95 communes with the highest number of individuals with T2D, as well as two neighboring communes  
96 where data collection was easily accessible, resulting in four selected communes from each district.  
97 Hence, a total of eight communes were purposely selected for the present study.

98

99 A total of 963 individuals who were treated for T2D in the district hospitals in the eight communes  
100 were initially invited to be included in the cross-sectional survey. Among these, 37 (3.8%) refused  
101 to participate and 78 (8.1%) did not stay at the address reported to the hospital or had moved away

102 at the time of data collection resulting in a total of 848 people who participated in the survey.  
103 Additionally, 42 individuals were excluded from the final sample, as they either had been diagnosed  
104 with diabetes prior to the age of 40 or did not remember when they were diagnosed. The final study  
105 sample included a total of 806 individuals diagnosed with T2D.

106

### 107 **Data Collection and Quality Control**

108 From each of the eight selected communes two village health workers were engaged in data  
109 collection. The village health works were responsible for the data collection in their own commune.  
110 Prior to the survey the interviewers attended a course consisting of a two-day workshop including  
111 testing and subsequent revision of the questionnaires. This was followed by one day of field-based  
112 training.

113

114 The interviewees were invited to participate in the survey either by mobile phone calls or by  
115 personal visits. Each participant was informed about the purpose of the interview in writing and  
116 verbally and, if agreeing in participation, asked to fill in a form of consent. The interviews were  
117 conducted individually and face-to-face in the participants homes to secure proper understanding  
118 of the questions as well as discretion in questions containing sensitive matters.

119

120 The survey questionnaire included a total of 176 questions with eight areas: the participants and  
121 their households, health and use of healthcare services, the participants lifestyle, homework and  
122 management of diabetes, informal social support, sexual wellbeing and emotions, use of  
123 smartphones and digital media, informal support, emotional impact, need for support, and use of  
124 electronic devices and internet. In the present study, demographic and socio-economic information

125 about the participants, their households, their lifestyles and their health, was used. To ensure  
126 correct translation to Vietnamese and back to English the questions were pre-tested and  
127 subsequently revised prior to data collection among a group of Vietnamese people with T2D. This  
128 was done in order to ensure the optimal understanding and interpretation of the questions and  
129 respective answering options.

130

### 131 **Outcome Variable**

132 DRD was assessed using the 5-item Problem Areas of Diabetes Distress (PAID5), a short form of PAID  
133 that has earlier proven good validity as a short form measure of DRD[16]. The PAID5 assess  
134 measures of DRD through five questions regarding emotional distress in relation to diabetes. In each  
135 question the patients were asked to what degree they had experienced the relevant feeling within  
136 the last four weeks prior to the interview. Items were scored on a 4-point Likert Scale, from 0 (not  
137 a problem) to 4 (serious problem) resulting in a possible total score from 0 to 20. A total score of  $\geq 8$   
138 points was defined as an indication of DRD[16]. To ensure validity and correct translation and  
139 understanding the Vietnamese PAID5 questionnaire was tested in a group of Vietnamese individuals  
140 with diabetes. Prior to the pilot-testing PAID5 had translated into Vietnamese and translated back  
141 to English.

142

### 143 **Exposure Variables**

144 As part of the questionnaire the participants were asked whether they had been diagnosed with  
145 hypertension, epilepsy, depression, liver and kidney disease, bone and joint problem, CVD or any  
146 other comorbid disease. For this analysis three physical comorbid predictors were chosen: 1)  
147 hypertension; 2) CVD; and 3) a combination of both hypertension and CVD.

148

## 149 **Co-variables**

150 Demographic and socio-economic characteristics were chosen as covariables based on previous  
151 literature, including a recent study of this present sample[8], and a priori based on an assumption  
152 that these variables could function as predictors for DRD in this specific socio-cultural context  
153 (Appendix E). Gender was categorized into: 1) Male; and 2) Female. Age was categorized into four  
154 age groups: 1) 40-49 years; 2) 50-59 years; 3) 60-69 years; and 4)  $\geq 70$  years. Current occupation was  
155 categorized into: 1) Unemployed; 2) Farmer; 3) Employment in small trade, as worker, as  
156 government employee, in a private company; and 4) Retired. The economic situation was based on  
157 self-reported household income and divided into: 1) Poor; 2) Near poor; 3) Medium; and 4) Wealthy.  
158 Relationship status was divided into: 1) Single; 2) Married; 3) Divorced; and 4) Widowed. Household  
159 size was categorised according to number of individuals in the household: 1) Living alone; 2) 2  
160 people; 3) 3 people; and 4)  $\geq 4$  people. Social support of relevance for T2D was divided into: 1) No  
161 unmet need for emotional support; 2) Unmet need for emotional support. Levels of physical  
162 exercise were based on how often the individuals exercised for 30 minutes or more: 1) Never or  
163 rarely; 2) Weekly to monthly; 3) Daily. Educational status was categorized according to highest  
164 achieved education: 1) No school; 2) Primary school; 3) Highschool; 4) University or above. Smoking  
165 status was categorized into: 1) Never smoked; 2) Previously smoked and; 3) Present smoker.

166

## 167 **Statistical Analysis**

168 A descriptive analysis was performed, and results were presented as frequencies for the total  
169 sample, for the group of individuals presenting with DRD and as prevalence of DRD in each group.  
170 Co-variables which had a statistically significant level of association with the outcome variable in the

171 bivariate analyses using a significance level of  $p < 0.05$  were included in the subsequent multivariate  
172 analyses. Results were presented as odd ratios (ORs) with 95% confidence interval (CI 95%). Further,  
173 the association between co-variables with statistically significant p-values and DRD are shown as  
174 ORs with CI 95%. To assess risk of effect modification, stratified analyses for all co-variables were  
175 performed with Breslow-day tests for homogeneity of ORs across strata, with a significance level of  
176  $p < 0.05$  for all co-variables. SPSS Statistic Software Package (version 28) was used for data analysis.

177

## 178 **RESULTS**

### 179 **General and Socio-economic Characteristics of Individuals with Type 2 Diabetes**

180 Characteristics of the total sample and distributions of individuals with DRD are presented in Table  
181 1. As we have been reporting in a previous study[8] we found that among the 806 individuals with  
182 an age of 40 or above, 50.0% (n=403) presented with DRD. Approximately half of the included  
183 individuals were female (52.7%) and found that being female had a statistically significant  
184 association with DRD (OR: 2.17, CI95%: 1.64-2.88). The majority were married and lived with one or  
185 more family members. Most individuals had an educational level of primary school or above, a  
186 moderate income and were engaged in daily physical activities. Majority of the individuals (88,3%)  
187 in the sample were non-smokers. With regards to education level and occupational status, the  
188 highest prevalence of DRD was observed among unemployed individuals (64.3%) and individuals  
189 who had no school education (70.0%). The prevalence of DRD among individuals who identified as  
190 being either poor or near poor were 78.7% and 67.6%, respectively. The percentage of individuals  
191 who reported an unmet need for emotional support of relevance for their diabetes self-  
192 management was 7.7%. In this group of individuals, the prevalence of DRD was 77.5% as compared  
193 to 48.6% among individuals who did not report an unmet need for emotional support. There was a



194 statistically significant difference in prevalence of DRD across groups with various levels of physical  
 195 activity with the lowest prevalence observed among individuals who exercised (44.7%).  
 196 Furthermore, there was a statically significant difference in prevalence of DRD across groups with  
 197 different smoking status with the lowest prevalence among present smokers (31.9%).

198

199 We found that gender, education level, occupation, economic situation, relationship status,  
 200 emotional support, level of physical exercise and smoking status were statistically significant  
 201 predictors of DRD.

202

203

204

205 **Table 1.** Demographic and social characteristics of the studied group with type-2 Diabetes.

206

| Characteristics of individuals with T2D                        | Number of individuals (% of total) | Number of individuals with DRD <sup>1</sup> (% of individuals with DRD) | Prevalence of DRD in % | p-value <sup>2</sup> | Bivariate analyses OR (CI 95%) |
|----------------------------------------------------------------|------------------------------------|-------------------------------------------------------------------------|------------------------|----------------------|--------------------------------|
| <b>All individuals</b>                                         | 806                                | 403                                                                     | 50.0                   |                      |                                |
| <b>Gender</b>                                                  |                                    |                                                                         |                        |                      |                                |
| Male                                                           | 381 (47.3)                         | 152 (37.7)                                                              | 39.9                   | <0.001               | 1.00                           |
| Female                                                         | 425 (52.7)                         | 251 (62.3)                                                              | 59.0                   |                      | 2.17 (1.64-2.88)               |
| <b>Age in years</b>                                            |                                    |                                                                         |                        |                      |                                |
| 40-49                                                          | 42 (5.2)                           | 19 (4.7)                                                                | 45.2                   | 0.725                |                                |
| 50-59                                                          | 161 (20.0)                         | 76 (18.9)                                                               | 47.2                   |                      |                                |
| 60-69                                                          | 357 (44.3)                         | 180 (44.7)                                                              | 50.4                   |                      |                                |
| ≥70                                                            | 246 (30.5)                         | 128 (31.8)                                                              | 52.0                   |                      |                                |
| <b>Education level</b>                                         |                                    |                                                                         |                        |                      |                                |
| No school                                                      | 10 (1.2)                           | 7 (1.7)                                                                 | 70.0                   | <0.001               | 1.00                           |
| Primary school                                                 | 170 (21.2)                         | 112 (27.8)                                                              | 65.9                   |                      | 0.83 (0.21-3.32)               |
| Highschool                                                     | 500 (62.0)                         | 245 (60.8)                                                              | 49.0                   |                      | 0.41 (0.12-1.61)               |
| University or above                                            | 126 (15.6)                         | 39 (9.7)                                                                | 31.0                   |                      | 0.19 (0.05-0.78)               |
| <b>Occupation</b>                                              |                                    |                                                                         |                        |                      |                                |
| Unemployed                                                     | 140 (17.4)                         | 90 (22.5)                                                               | 64.3                   | <0.001               | 1.00                           |
| Farmer                                                         | 296 (36.7)                         | 170 (42.6)                                                              | 57.4                   |                      | 0.74 (0.50-1.14)               |
| Small trade, worker<br>government employee,<br>private company | 104 (12.9)                         | 44 (26.1)                                                               | 42.3                   |                      | 0.41 (0.24-0.69)               |
| Retired                                                        | 258 (32.0)                         | 95 (23.8)                                                               | 36.8                   |                      | 0.32 (0.21-0.50)               |
| <b>Economic situation</b>                                      |                                    |                                                                         |                        |                      |                                |
| Poor                                                           | 61 (7.6)                           | 48 (11.9)                                                               | 78.7                   | <0.001               | 1.00                           |
| Near Poor                                                      | 34 (4.2)                           | 23 (5.7)                                                                | 67.6                   |                      | 0.57 (0.22-1.46)               |
| Medium                                                         | 630 (79.2)                         | 303 (75.1)                                                              | 48.1                   |                      | 0.25 (0.13-0.46)               |
| Wealthy                                                        | 73 (9.1)                           | 29 (7.1)                                                                | 39.7                   |                      | 0.18 (0.08-0.39)               |
| <b>Relationship status</b>                                     |                                    |                                                                         |                        |                      |                                |

|                             |            |            |      |        |                  |
|-----------------------------|------------|------------|------|--------|------------------|
| Single                      | 38 (4.7)   | 26 (6.5)   | 68.4 | 0.035  | 1.00             |
| Married                     | 593 (73.6) | 281 (69.7) | 47.4 |        | 0.42 (0.21-0.84) |
| Divorced                    | 30 (3.7)   | 16 (4.0)   | 53.3 |        | 0.53 (0.20-1.42) |
| Widowed                     | 145 (18.0) | 80 (19.9)  | 55.2 |        | 0.57 (0.27-1.21) |
| <b>Household size</b>       |            |            |      |        |                  |
| Living alone                | 89 (11.0)  | 55 (13.6)  | 61.8 | 0.087  |                  |
| 2 members                   | 318 (39.5) | 155 (38.5) | 48.7 |        |                  |
| 3 members                   | 121 (15.0) | 60 (14.9)  | 49.6 |        |                  |
| ≥4 members                  | 278 (34.5) | 133 (33.0) | 47.8 |        |                  |
| <b>Year since diagnosis</b> |            |            |      |        |                  |
| <5                          | 389 (48.3) | 203 (50.4) | 52.2 | 0.483  |                  |
| 5-10                        | 237 (29.4) | 113 (28.0) | 47.7 |        |                  |
| >10                         | 180 (22.3) | 87 (21.9)  | 48.3 |        |                  |
| <b>Emotional support</b>    |            |            |      |        |                  |
| No unmet needs              | 766 (95.0) | 372 (92.3) | 48.6 | <0.001 | 1.00             |
| Unmet needs                 | 40 (5.0)   | 31 (7.7)   | 77.5 |        | 3.65 (1.71-7.77) |
| <b>Physical exercise</b>    |            |            |      |        |                  |
| Never or rarely             | 154 (19.1) | 106 (26.3) | 68.8 | <0.001 | 1.00             |
| Monthly to weekly           | 28 (3.5)   | 18 (4.5)   | 64.3 |        | 0.82 (0.35-1.90) |
| Daily                       | 624 (77.4) | 279 (69.2) | 44.7 |        | 0.37 (0.25-0.53) |
| <b>Smoking status</b>       |            |            |      |        |                  |
| Never smoked                | 570 (70.7) | 308 (76.4) | 54.0 | <0.001 | 1.00             |
| Previously smoked           | 142 (17.6) | 65 (16.1)  | 45.8 |        | 0.72 (0.50-1.04) |
| Present smoker              | 94 (11.7)  | 30 (7.4)   | 31.9 |        | 0.40 (0.25-0.63) |

207 <sup>1</sup>DRD is the emotional distress and behavioural changes associated with diabetes[4, 5]. The overall prevalence of DRD  
208 is 50%.

209 <sup>2</sup>p-value from bivariate analyses

210

## 211 **Impacts of Self-reported Hypertension and Cardiovascular Disease on Diabetes Distress**

212 Among individuals with T2D, 35.6% and 7.3% reported only hypertension and CVD as comorbidities,

213 respectively, and additionally 21.2% reported a combination of hypertension and CVD (Table 2).

214 Results of the analyses of the associations between comorbidities and DRD among individuals living

215 with T2D are presented in Table 2. The results of multivariate analyses showed that individuals with

216 a combination of hypertension and CVD had a higher odds ratio for DRD as compared to individuals

217 with T2D only (OR=1.67; CI95%: 1.11-2.52). There was no significantly increased odds ratio for DRD

218 among individuals with hypertension alone or CVD alone and DRD (OR=1.17; CI95%: 0.81-1.64 and

219 OR=0.92; CI95%: 0.50-1.70, respectively).

221

222

223

224  
225  
226  
227

**Table 2.** Results of bivariate and multivariate analyses of the associations between the selected predictors, hypertension and CVD, and DRD.

| Characteristics Of individuals with disease | Number of individuals (% of total sample) | Number of individuals with DRD (% of total sample) | Prevalence of DRD in % | Results of statistical analyses        |                                                   |
|---------------------------------------------|-------------------------------------------|----------------------------------------------------|------------------------|----------------------------------------|---------------------------------------------------|
|                                             |                                           |                                                    |                        | Bivariate analyses<br>Crude OR (CI95%) | Multivariate analysis<br>OR (CI 95%) <sup>3</sup> |
| TD2 only                                    | 289 (35.9)                                | 135 (16.7)                                         | 46.7                   | 1.00                                   | 1.00                                              |
| TD2 + Hypertension <sup>1</sup>             | 287 (35.6)                                | 143 (17.7)                                         | 49.8                   | 1.13 (0.82-1.57)                       | 1.17(0.81-1.64)                                   |
| TD2 + CVD <sup>2</sup>                      | 59 (7.3)                                  | 27 (6.7)                                           | 45.8                   | 0.96 (0.55-1.69)                       | 0.92 (0.50-1.70)                                  |
| TD2 + Hypertension + CVD                    | 171 (21.2)                                | 98 (12.2)                                          | 57.3                   | 1.53 (1.05-2.24)                       | 1.67 (1.11-2.52)                                  |

228  
229  
230  
231  
232

<sup>1</sup>Individuals with CVD removed from analyses

<sup>2</sup>Individuals with hypertension removed from analyses

<sup>3</sup>Adjusted for gender, education, occupation, economic situation, relationship status, emotional support, physical exercise and smoking status

### 233 Possible Effect Modification of Co-variables

234 The results of Breslow-day tests for analysis of possible effect modification are shown in Table 3.  
235 The co-variable age functioned as a statistically significant effect modifier in the association  
236 between hypertension only and DRD ( $\chi^2=10.16$ ,  $df=3$ ,  $p=0.0017$ ); and physical exercise functioned  
237 as a statistically significant effect modifier in the association between the group that presented with  
238 a combination of hypertension and CVD and DRD ( $\chi^2=7.137$ ,  $df=2$ ,  $p=0.028$ ). No effect  
239 modification was observed for other co-variables\_ (Stratified Odds Ratios is available in appendix A,  
240 B and C).

241  
242  
243  
244  
245

**Table 3.** Breslow-day tests for homogeneity of the odds ratios within the comorbidity subgroups of the studied group with type-2 diabetes

| Characteristics of individuals with disease | Results of Breslow-day test for homogeneity |                                            |                                            |
|---------------------------------------------|---------------------------------------------|--------------------------------------------|--------------------------------------------|
|                                             | T2D + Hypertension <sup>1</sup>             | T2D + CVD <sup>2</sup>                     | T2D+ hypertension + CVD <sup>3</sup>       |
| Gender                                      | $\chi^2 = 0.353$ , $df = 1$<br>$p = 0.552$  | $\chi^2 = 3.442$ , $df = 1$<br>$p = 0.064$ | $\chi^2 = 0.191$ , $df = 1$<br>$p = 0.662$ |
| Age in years                                | $\chi^2 = 10.162$ , $df = 3$<br>$p = 0.017$ | $\chi^2 = 5.876$ , $df = 3$<br>$p = 0.118$ | $\chi^2 = 1.775$ , $df = 3$<br>$p = 0.620$ |

|                      |                                         |                                         |                                         |
|----------------------|-----------------------------------------|-----------------------------------------|-----------------------------------------|
| Education level      | $\chi^2 = 3.929, df = 3$<br>$p = 0.269$ | $\chi^2 = 2.119, df = 2$<br>$p = 0.347$ | $\chi^2 = 1.755, df = 3$<br>$p = 0.625$ |
| Occupation           | $\chi^2 = 3.365, df = 3$<br>$p = 0.339$ | $\chi^2 = 5.149, df = 3$<br>$p = 0.161$ | $\chi^2 = 0.526, df = 3$<br>$p = 0.913$ |
| Economic situation   | $\chi^2 = 5.124, df = 3$<br>$p = 0.163$ | $\chi^2 = 2.119, df = 2$<br>$p = 0.347$ | $\chi^2 = 3.096, df = 3$<br>$p = 0.377$ |
| Relationship status  | $\chi^2 = 3.120, df = 3$<br>$p = 0.374$ | $\chi^2 = 1.599, df = 2$<br>$p = 0.450$ | $\chi^2 = 4.007, df = 3$<br>$p = 0.261$ |
| Household size       | $\chi^2 = 3.609, df = 3$<br>$p = 0.307$ | $\chi^2 = 0.541, df = 3$<br>$p = 0.910$ | $\chi^2 = 2.970, df = 3$<br>$p = 0.396$ |
| Year since diagnosis | $\chi^2 = 1.292, df = 2$<br>$p = 0.524$ | $\chi^2 = 1.967, df = 2$<br>$p = 0.374$ | $\chi^2 = 4.931, df = 2$<br>$p = 0.085$ |
| Emotional support    | $\chi^2 = 0.341, df = 1$<br>$p = 0.559$ | $\chi^2 = 0.608, df = 1$<br>$p = 0.436$ | $\chi^2 = 0.383, df = 1$<br>$p = 0.536$ |
| Physical exercise    | $\chi^2 = 1.730, df = 2$<br>$p = 0.421$ | $\chi^2 = 1.827, df = 2$<br>$p = 0.401$ | $\chi^2 = 7.137, df = 2$<br>$p = 0.028$ |
| Smoking status       | $\chi^2 = 0.061, df = 2$<br>$p = 0.970$ | $\chi^2 = 3.605, df = 2$<br>$p = 0.165$ | $\chi^2 = 0.424, df = 2$<br>$p = 0.809$ |

- 246 <sup>1</sup> Possible effect modifiers in the association between hypertension and DRD  
247 <sup>2</sup> Possible effect modifiers in the association between CVD and DRD  
248 <sup>3</sup> Possible effect modifiers in the association between hypertension + CVD and DRD  
249

250

## 251 DISCUSSION

252 In the present study, the prevalence of DRD were 39.9% among the men and 59.0% among the  
253 women, respectively (Table 1), and a combination of hypertension and CVD was a statistically  
254 significant predictor for DRD (Table 2).

255

256 In comparison with the observed prevalence of DRD among individuals living with T2D in the present  
257 study, a lower prevalence of DRD was reported from a study in Ho Chi Minh City, Vietnam  
258 (29.4%)[17]. However, large differences in prevalence of DRD across Asian countries have been  
259 reported with 8.9 % in Thailand, 42.2% in China, 49.2% in Malaysia and 76.2% in Pakistan [18-21].  
260 These differences might be caused by variations in the populations studied regarding demographic  
261 and socio-economic factors, access to and quality of healthcare, study designs and tools for

262 assessment of DRD. To assess DRD we used PAID5 while Diabetes Distress Scale (DDS) was used in  
263 other studies [17-21]. Though both PAID5 and DDS are considered valid tools for assessment of  
264 DRD[22], PAID5 specifically covers the emotional aspects of DRD while DDS focuses on diabetes self-  
265 management, food-related problems and stress related to treatment[22]. This might contribute to  
266 the difference in DRD prevalence between the studies. PAID5 has not been validated in Vietnam but  
267 it has been validated in internationally as a reliable tool for quick assessment of DRD with a  
268 sensitivity of 94% and a specificity 89% of for detecting DRD [16]. Furthermore PAID5 is has been  
269 validated as a reliable assessment tool in other Asian countries including China[23] and Korea[24].

270

271 In the present study, being female was associated with an increased risk of DRD. This finding  
272 corresponds to the finding of a large meta-analysis including studies from the USA, the Netherlands  
273 China and Singapore[7]. In Vietnam, after marriage women are more likely to settle down in the  
274 household of the husband's family, resulting in separation from their own family[25], which  
275 potentially could isolate the women from their natal relatives. This could lead to lack of emotional  
276 support and potentially lead to a higher risk of DRD amongst females later in life. Another aspect of  
277 the gender-specific practices in Vietnam is that women are more often responsible for taking care  
278 of the household and all the members, both children and the elderly[25]. This practical and  
279 emotional responsibility could additionally contribute to a higher level of DRD.

280

281 Several studies have found that being a present smoker was associated with DRD[26, 27]. In the  
282 present study, we found the lowest prevalence of DRD among smokers, followed by earlier smokers  
283 and the highest prevalence of DRD among the individuals who never smoked. Since DRD in our study  
284 was self-reported, the difference in results compared to previous studies could be due to

285 underreporting of DRD within the group of smokers, which might have caused a differential  
286 misclassification. Additionally, in Vietnam it is uncommon for female individuals to smoke. A  
287 Vietnamese study reported that the prevalence of current smoking among male and female patients  
288 in health care facilities were 34.6% and 1.1%, respectively[28]. This difference in distribution  
289 between gender may likely contribute to our results.

290

291 T2D and hypertension are often present at the same time due to multiple physiological factors[29].  
292 This corresponds well with the results of our study where we found that over half of individuals  
293 (56.8%) reported having hypertension with an additional 21.2% reporting having a combination of  
294 hypertension and CVD. The high proportion of individuals who reported CVD in addition to  
295 hypertension could be caused by the fact that many are diagnosed late or have poor blood pressure  
296 control as reported in a previous Vietnamese study [30] leading to cardio-vascular complications.  
297 Only 7.3% reported having CVD as only comorbidity. This may be due to the fact that CVD is  
298 overrepresented among individuals with both T2D and hypertension[12].

299

300 A previous study, which included the same sample as used in the present study, reported an  
301 association between number of unmet needs for social support, including emotional and economic  
302 needs, and the risk of DRD[8]. This suggest that individuals presenting with DRD are not only at risk  
303 of a more severe course of disease but are also in a social perspective a more exposed group, which  
304 makes them important to identify in order to successfully aim the treatment towards T2D in rural  
305 Vietnam. The previous study further reported that the risk of developing DRD increased with  
306 number of types of unmet needs for social support[8]. The increased risk of DRD among individuals  
307 with multiple unmet needs aligns with the results in the present study. In the present study, the risk

308 of DRD increased if the individual reported multiple comorbidities, suggesting that the risk of DRD  
309 is associated with an increased amount of pressure. The result of the present study showed that  
310 presenting with a combination of hypertension and CVD in combination with diabetes statistically  
311 increased the risk of DRD. This is supporting the assumption that T2D comorbidities are important  
312 to take into consideration in order to predict variation in individual risk of a more severe course of  
313 disease and a poorer treatment compliance. This assumption is further supported by a study from  
314 Thailand[18] and a study from Iran [31] that both showed an association between diabetic  
315 comorbidity and the risk of DRD. Since the cross-sectional nature of the design does not allow us to  
316 determine the direction of causalities, the association between DRD and individuals with multiple  
317 comorbidities could also be caused by the physical complications which commonly co-exist with  
318 DRD, e.g. poorer blood sugar control and higher levels of triglycerides[5, 10] causing a higher  
319 prevalence of individuals with comorbidities.

320

321 Presenting with only hypertension as a diabetic comorbidity showed a positive association to DRD,  
322 though it was not a significant predictor. Several earlier studies have linked hypertension to mental  
323 unease, including a study carried out in rural areas of Vietnam that showed that quality of life among  
324 individuals living with hypertension was low regarding the psychological aspects of health[32], and  
325 a German study that found that in individuals with T2D hypertension reduced quality of life[33]. This  
326 adds to the assumption that there could be an association between hypertension and mental well-  
327 being, including DRD, within individuals with T2D, but this will need further investigation in order to  
328 assess in detail.

329

330 There was no increased risk of DRD in the CVD subgroup. This contrasts with earlier studies showing  
331 that CVD increased risk of DRD among individuals living with diabetes mellitus [14, 15, 34]. The  
332 observations in the present study could, however, be due to the very small sample of individuals  
333 only reporting CVD. Hence, lack of statistical power would reduce the chance of detecting a  
334 statistically significant association between CVD and DRD.

335

336 The present study included a relatively large sample size and had a high participation and response  
337 rate. The study had, however, some limitations. Though our study included a large sample size, the  
338 comorbidity subgroups had pronounced differences in sample size.

339

340 In the present study, participants were recruited through lists of individuals diagnosed and treated  
341 at the district hospitals. Individuals treated at province hospitals or national referral hospitals were  
342 not included in the sample. In Vietnam, individuals with more severe disease or in need of more  
343 treatment are often referred for treatment at the province or national referral hospitals. This will  
344 most likely lead to a selection bias and exclude individuals with more severe T2D related  
345 complications and comorbidities. Also, this study was carried out in Thai Binh Province and the  
346 findings may not be representative for other areas of Vietnam.

347

348 Self-reported questionnaire-based data is a great representative of self-perception. Nonetheless, a  
349 part of the Vietnamese practise includes a strong wish of not troubling or being a burden to others  
350 and, hence, a strong tendency to tone down personal problems and obstacles.(Gammeltoft, Tine  
351 M: The Force of Love: Type II Diabetes in Vietnam as Tentatively Transformative Experince), [35].



352 This could potentially lead to an underreporting of DRD and hereby a reporting bias which could  
353 potentially lead to differential misclassification.

354

355 Furthermore, since data on comorbidities was based on self-reported information, these exposure  
356 variables may also be prone to various types of misclassifications. This could lead to an  
357 underestimation of reported comorbidities, as the likelihood of identifying with a disease increases  
358 with the severity of the disease and the need for treatment, thereby potentially leaving out the  
359 milder cases. In contrast, a Chinese study showed that having DRD has a negative impact on self-  
360 reported health status[36], indicating that there might be an overreporting of comorbidities. If the  
361 misclassification of comorbidity data were evenly distributed between individuals with and without  
362 comorbidity this non-differential misclassification would, however, not affect the observed strength  
363 of the associations between hypertension and/or CVD and DRD.

364

## 365 **CONCLUSION**

366 The findings in the present study suggest that in rural areas in Vietnam there is an increased risk  
367 of DRD among individuals who reported a combination of hypertension and CVD, compared to those  
368 who live with T2D and none of the comorbidities. The findings of this study suggest that taking  
369 diabetes-related comorbidities into consideration when treating T2D can potentially be of great  
370 importance in order to successfully identify individuals at risk of DRD, and thereby improve diabetes  
371 treatment and outcome. Further studies with more participants are needed in order to fully  
372 understand the relationship between comorbidities and DRD.

373

## 374 **Funding Sources**

375 This study is a part of the interdisciplinary research project, Living Together with Chronic Disease:  
376 Informal Support for Diabetes Management in Vietnam (VALID) (17-M09-KU), funded by the  
377 Ministry of Foreign Affairs of Denmark. The research is conducted in collaboration with the Strategic  
378 Sector Cooperation project, Strengthening the Frontline Grassroots Health Worker: Prevention and  
379 Management of NCDs at the Primary Health Care Level, carried out by the Ministries of Health of  
380 Denmark and Vietnam.

381

### 382 **Conflict of Interest**

383 On behalf of all authors, the correspondent author states that there is no conflict of interest.

384

### 385 **Acknowledgement**

386 We are grateful to the research assistants from Quynh Phu District and Vu Thu District who  
387 conducted the interviews, and we thank the staff at the Population Center and Commune Health  
388 Centers in Thai Binh Province for their assistance. Additionally, we would like to thank everyone  
389 from Quynh Phu District and Vu Thu District who participated in the interviews. We also want to  
390 thank the Biostatistics department of University of Copenhagen for providing assistance with the  
391 Breslow-day analyses.

392

### 393 **Author Responsibilities**

394 All authors contributed to subsequent revisions and editing of the manuscript.

## References

1. Yoon, K.H., et al., *Epidemic obesity and type 2 diabetes in Asia*. Lancet, 2006. **368**(9548): p. 1681-8.
2. Khue, N.T., *Diabetes in Vietnam*. Ann Glob Health, 2015. **81**(6): p. 870-3.
3. Nguyen, C.T., et al., *Prevalence of and Risk Factors for Type 2 Diabetes Mellitus in Vietnam: A Systematic Review*. Asia Pac J Public Health, 2015. **27**(6): p. 588-600.
4. Fisher, L., W.H. Polonsky, and D. Hessler, *Addressing diabetes distress in clinical care: a practical guide*. Diabet Med, 2019. **36**(7): p. 803-812.
5. Aljuaid, M.O., et al., *Diabetes-Related Distress Assessment among Type 2 Diabetes Patients*. J Diabetes Res, 2018. **2018**: p. 7328128.
6. Polonsky, W.H., et al., *Assessing psychosocial distress in diabetes: development of the diabetes distress scale*. Diabetes Care, 2005. **28**(3): p. 626-31.
7. Perrin, N.E., et al., *The prevalence of diabetes-specific emotional distress in people with Type 2 diabetes: a systematic review and meta-analysis*. Diabet Med, 2017. **34**(11): p. 1508-1520.
8. Thi, D.K., et al., *Unmet needs for social support and diabetes-related distress among people living with type 2 diabetes in Thai Binh, Vietnam: a cross-sectional study*. BMC Public Health, 2021. **21**(1): p. 1532.
9. Nguyen, V.B., et al., *Diabetes-Related Distress and Its Associated Factors Among Patients with Diabetes in Vietnam*. Psychol Res Behav Manag, 2020. **13**: p. 1181-1189.
10. Asuzu, C.C., et al., *Pathways for the relationship between diabetes distress, depression, fatalism and glycemic control in adults with type 2 diabetes*. J Diabetes Complications, 2017. **31**(1): p. 169-174.
11. Thi Bui, D.H., et al., *Polypharmacy among people living with type 2 diabetes mellitus in rural communes in Vietnam*. PLoS One, 2021. **16**(4): p. e0249849.
12. Petrie, J.R., T.J. Guzik, and R.M. Touyz, *Diabetes, Hypertension, and Cardiovascular Disease: Clinical Insights and Vascular Mechanisms*. Can J Cardiol, 2018. **34**(5): p. 575-584.
13. Einarson, T.R., et al., *Prevalence of cardiovascular disease in type 2 diabetes: a systematic literature review of scientific evidence from across the world in 2007-2017*. Cardiovasc Diabetol, 2018. **17**(1): p. 83.
14. Winchester, R.J., et al., *Depressive symptoms, serious psychological distress, diabetes distress and cardiovascular risk factor control in patients with type 2 diabetes*. J Diabetes Complications, 2016. **30**(2): p. 312-7.
15. Adriaanse, M.C., et al., *Diabetes-related symptom distress in association with glucose metabolism and comorbidity: the Hoorn Study*. Diabetes Care, 2008. **31**(12): p. 2268-70.
16. McGuire, B.E., et al., *Short-form measures of diabetes-related emotional distress: the Problem Areas in Diabetes Scale (PAID)-5 and PAID-1*. Diabetologia, 2010. **53**(1): p. 66-9.
17. Huynh, G., et al., *Diabetes-Related Distress Among People with Type 2 Diabetes in Ho Chi Minh City, Vietnam: Prevalence and Associated Factors*. Diabetes Metab Syndr Obes, 2021. **14**: p. 683-690.
18. Tunsuchart, K., et al., *Type 2 Diabetes Mellitus Related Distress in Thailand*. Int J Environ Res Public Health, 2020. **17**(7).
19. Zhou, H., et al., *Diabetes-related distress and its associated factors among patients with type 2 diabetes mellitus in China*. Psychiatry Res, 2017. **252**: p. 45-50.

20. Chew, B.H., et al., *Diabetes-Related Distress, Depression and Distress-Depression among Adults with Type 2 Diabetes Mellitus in Malaysia*. PLoS One, 2016. **11**(3): p. e0152095.
21. Arif, M.A., et al., *The ADRIFT study - Assessing Diabetes Distress and its associated factors in the Pakistani population*. J Pak Med Assoc, 2018. **68**(11): p. 1590-1596.
22. Schmitt, A., et al., *How to assess diabetes distress: comparison of the Problem Areas in Diabetes Scale (PAID) and the Diabetes Distress Scale (DDS)*. Diabet Med, 2016. **33**(6): p. 835-43.
23. Hsu, H.C., et al., *Developing and psychometric testing of a short-form problem areas in diabetes scale in chinese patients*. J Nurs Res, 2013. **21**(3): p. 212-8.
24. Lee, E.H., et al., *Measurement of diabetes-related emotional distress using the Problem Areas in Diabetes scale: psychometric evaluations show that the short form is better than the full form*. Health Qual Life Outcomes, 2014. **12**: p. 142.
25. Nhi, T.T., N.T.T. Hạnh, and T.M. Gammeltoft, *Emotional violence and maternal mental health: a qualitative study among women in northern Vietnam*. BMC Womens Health, 2018. **18**(1): p. 58.
26. Alzughbi, T., et al., *Diabetes-Related Distress and Depression in Saudis with Type 2 Diabetes*. Psychol Res Behav Manag, 2020. **13**: p. 453-458.
27. Geleta, B.A., et al., *Prevalence of Diabetes Related Distress and Associated Factors Among Type 2 Diabetes Patients Attending Hospitals, Southwest Ethiopia, 2020: A Cross-Sectional Study*. Patient Relat Outcome Meas, 2021. **12**: p. 13-22.
28. Huang, W.C., et al., *Smoking behaviour among adult patients presenting to health facilities in four provinces of Vietnam*. BMC Public Health, 2021. **21**(1): p. 845.
29. Grossman, A. and E. Grossman, *Blood pressure control in type 2 diabetic patients*. Cardiovasc Diabetol, 2017. **16**(1): p. 3.
30. Ha, D.A., et al., *Prevalence, Awareness, Treatment, and Control of High Blood Pressure: A Population-Based Survey in Thai Nguyen, Vietnam*. PLoS One, 2013. **8**(6): p. e66792.
31. Tol, A., et al., *Assessment of diabetic distress and disease related factors in patients with type 2 diabetes in Isfahan: A way to tailor an effective intervention planning in Isfahan-Iran*. J Diabetes Metab Disord, 2012. **11**(1): p. 20.
32. Dhillon, H., R.B. Nordin, and A. Ramadas, *Quality of Life and Associated Factors among Primary Care Asian Patients with Type 2 Diabetes Mellitus*. Int J Environ Res Public Health, 2019. **16**(19).
33. Miksch, A., et al., *Additional impact of concomitant hypertension and osteoarthritis on quality of life among patients with type 2 diabetes in primary care in Germany - a cross-sectional survey*. Health Qual Life Outcomes, 2009. **7**: p. 19.
34. Deaton, C., et al., *The synergistic effect of heart disease and diabetes on self-management, symptoms, and health status*. Heart Lung, 2006. **35**(5): p. 315-23.
35. Gammeltoft, T.M., et al., *Everyday disease diplomacy: an ethnographic study of diabetes self-care in Vietnam*. BMC Public Health, 2022. **22**(1): p. 828.
36. Guo, H., et al., *How psychosocial outcomes impact on the self-reported health status in type 2 diabetes patients: Findings from the Diabetes Attitudes, Wishes and Needs (DAWN) study in eastern China*. PLoS One, 2018. **13**(1): p. e0190484.
